# Supplementary material for: Global Egr1-miRNAs Binding Analysis in PMA-Induced K562 Cells Using ChIP-Seq
Source: Hindawi journal article supplement (doi:10.1155/2010/867517), 2010-01-01
Supplement: f4 [file 867517.f4.pdf]

Supplementary talbes:

Talbe 1: The list of ChIP-PCR primers for 12 miRNAs.

| miRNA gene    | FP                   | RP                      | PCR<br>product<br>size |
|---------------|----------------------|-------------------------|------------------------|
| miR-17        | GGGCGGGGAGGTCGGAAGTA | CGAAGGACCATGTGGGTGAATG  | 112bp                  |
| miR-10a       | CTCCGGCAATGGCGAGTT   | TGGAGCTTTACACCAAAGGGA   | 97bp                   |
| miR-25        | CGCTTCGCTCTTAGTAAACA | CAATGGCTGGACTGGCTC      | 101bp                  |
| miR-23b       | GGGGCCACTGGGAAACGTC  | CGCTCCTGGAGTCGAAACCTG   | 119bp                  |
| miR-135b      | GGCTGTCTGGTCGGTGAA   | TGAGTAATACATGGCTGGTTCA  | 83bp                   |
| miR-130b      | GGTCATTTGGATGTGGGTCT | GTGTCCTGTTCTCCTGCTC     | 194bp                  |
| miR-326       | GGTGGTTGGAAGCCGAGGGT | AAGGGTGGAGCACAGGGCGAAG  | 112bp                  |
| miR-141       | AGATGACGGCTGACGATAA  | TGACAGAAAGTGCCTAGACTGAA | 106bp                  |
| miR-152       | GTCCTGCTTCCTGCCTGCTC | AAAGTGGGCTTTGCTTGTG     | 99bp                   |
| miR-199b      | TCAGGGAACCAGGTGAGTG  | AGGCAGAGTGGGAGGCTTG     | 155bp                  |
| miR-95        | CGGAATCCGGGAGTCGCTAG | AAAGAAGAGTTGGCCCAGAAGG  | 113bp                  |
| <i>let-7g</i> | GGTCGGGTATGCTGCTGG   | GGACGCTGCGGTGGACTAG     | 89bp                   |

Table 2: miRNA promoter and pre-miRNAs annotation of Egr1 binding sites

| mir_ID                | TSS_start | TSS_stop  | pre_mir_start-stop  | score | strand | chr  | peak_start | peak_end  | reads_count |
|-----------------------|-----------|-----------|---------------------|-------|--------|------|------------|-----------|-------------|
| hsa-mir-101-1         | 65305901  | 65306101  |                     | 10    | -      | chr1 | 65304361   | 65306441  | 35          |
| hsa-mir-555           | 153798677 | 153798877 |                     | 20    | -      | chr1 | 153798581  | 153799810 | 33          |
| hsa-mir-30e/30c-1     | 40929851  | 40930051  |                     | 19    | +      | chr1 | 40929438   | 40930684  | 25          |
| (cluster-hsa-mir-30a) |           |           |                     |       |        |      |            |           |             |
| hsa-mir-135b          | 203685571 | 203685771 | 203684053-203684149 | 20    | -      | chr1 | 203684801  | 203687659 | 20          |
| hsa-mir-92b           | 153429179 | 153434335 | 153431592-153431687 | 10    | +      | chr1 | 153429752  | 153430844 | 13          |

|                      |           |           |                      |    |   |       |           |           |     |
|----------------------|-----------|-----------|----------------------|----|---|-------|-----------|-----------|-----|
| hsa-mir-556          | 160306104 | 160306304 |                      | 19 | + | chr1  | 160305486 | 160307110 | 12  |
| hsa-mir-92b          | 153429179 | 153434335 | 153431592-153431687  | 10 | + | chr1  | 153427927 | 153429740 | 11  |
| hsa-mir-200b         | 1088265   | 1090140   | 1092347-1092441      | 10 | + | chr1  | 1090788   | 1092194   | 11  |
| hsa-mir-200b         | 1088265   | 1090140   | 1092347-1092441      | 10 | + | chr1  | 1093470   | 1094709   | 10  |
| hsa-mir-200b         | 1088265   | 1090140   |                      | 10 | + | chr1  | 1086466   | 1087332   | 9   |
| hsa-mir-146b         | 104184797 | 104186757 | 104186259-104186331  | 10 | + | chr10 | 104184853 | 104186029 | 23  |
| hsa-mir-346          | 88116829  | 88117029  |                      | 7  | - | chr10 | 88114636  | 88115944  | 12  |
| hsa-mir-346          | 88113726  | 88113926  |                      | 9  | - | chr10 | 88114636  | 88115944  | 12  |
| hsa-mir-346          | 88116130  | 88116330  |                      | 22 | - | chr10 | 88114636  | 88115944  | 12  |
| hsa-mir-605          | 52421023  | 52421223  |                      | 20 | + | chr10 | 52420222  | 52422200  | 11  |
| hsa-mir-604          | 30064636  | 30064836  |                      | 17 | - | chr10 | 30064695  | 30066725  | 10  |
| hsa-mir-326          | 74740421  | 74740621  |                      | 19 | - | chr11 | 74739237  | 74741496  | 17  |
| hsa-mir-483          | 2125516   | 2125716   |                      | 18 | - | chr11 | 2126682   | 2128933   | 12  |
| hsa-mir-483          | 2118637   | 2118837   | 2111940-2112015      | 9  | - | chr11 | 2115360   | 2117075   | 11  |
| hsa-mir-483          | 2116071   | 2116271   | 2111940-2112015      | 10 | - | chr11 | 2115360   | 2117075   | 11  |
| hsa-mir-483          | 2118637   | 2118837   |                      | 9  | - | chr11 | 2117140   | 2118920   | 11  |
| hsa-mir-483          | 2116071   | 2116271   |                      | 10 | - | chr11 | 2117140   | 2118920   | 11  |
| hsa-mir-611          | 61491579  | 61491779  |                      | 1  | - | chr11 | 61495484  | 61496445  | 10  |
| hsa-mir-619          | 107775395 | 107775595 |                      | 20 | - | chr12 | 107774349 | 107776147 | 45  |
| hsa-mir-619          |           |           | 107754813- 107754911 |    | - | chr12 | 107754298 | 107755296 | 9   |
| hsa-mir-26a-2        | 56526689  | 56526889  |                      | 24 | - | chr12 | 56524889  | 56527557  | 34  |
| hsa-mir-616          | 56200467  | 56200667  | 56199213- 56199309   | 30 | - | chr12 | 56199944  | 56201247  | 17  |
| hsa-mir-616          | 56200467  | 56200667  | 56199213- 56199309   | 30 | - | chr12 | 56202693  | 56203724  | 14  |
| hsa-mir-200c         | 6942568   | 6942768   | 6943123-6943190      | 20 | + | chr12 | 6939984   | 6941280   | 17  |
| hsa-mir-141          | 6942568   | 6942768   | 6943521-6943615      | 20 | + | chr12 | 6939984   | 6941280   | 17  |
| hsa-mir-615          | 52697079  | 52697279  |                      | 6  | + | chr12 | 52697573  | 52699045  | 15  |
| hsa-mir-548c         | 63290459  | 63290659  |                      | 20 | + | chr12 | 63288961  | 63291268  | 11  |
| hsa-mir-620          | 115199426 | 115199626 |                      | 19 | - | chr12 | 115199056 | 115200256 | 9   |
| hsa-mir-17           | 90797974  | 90798174  | 90800860-90800943    | 35 | + | chr13 | 90796751  | 90799889  | 171 |
| (cluster-hsa-mir-17) |           |           |                      |    |   |       |           |           |     |
| hsa-mir-18a          | 90797974  | 90798174  | 90800860-90800943    | 35 | + | chr13 | 90796751  | 90799889  | 171 |
| (cluster-hsa-mir-17) |           |           |                      |    |   |       |           |           |     |
| hsa-mir-19a          | 90797974  | 90798174  | 90800860-90800943    | 25 | + | chr13 | 90796751  | 90799889  | 171 |
| (cluster-hsa-mir-17) |           |           |                      |    |   |       |           |           |     |
| hsa-mir-20a          | 90797974  | 90798174  | 90801320-90801390    | 25 | + | chr13 | 90796751  | 90799889  | 171 |
| (cluster-hsa-mir-17) |           |           |                      |    |   |       |           |           |     |
| hsa-mir-19b-1        | 90797974  | 90798174  | 90801447-90801533    | 25 | + | chr13 | 90796751  | 90799889  | 171 |
| (cluster-hsa-mir-17) |           |           |                      |    |   |       |           |           |     |
| hsa-mir-92a-1        | 90797974  | 90798174  | 90801569-90801646    | 25 | + | chr13 | 90796751  | 90799889  | 171 |
| (cluster-hsa-mir-17) |           |           |                      |    |   |       |           |           |     |
| hsa-mir-16-1         | 49597556  | 49597756  |                      | 13 | - | chr13 | 49595986  | 49597162  | 13  |
| hsa-mir-15a          | 49597556  | 49597756  |                      | 13 | - | chr13 | 49595986  | 49597162  | 13  |

|                       |           |           |                      |    |   |       |           |           |    |
|-----------------------|-----------|-----------|----------------------|----|---|-------|-----------|-----------|----|
| hsa-mir-342           | 99601429  | 99601629  |                      | 4  | + | chr14 | 99604136  | 99605350  | 14 |
| hsa-mir-342           |           |           | 99645745- 99645843   |    | + | chr14 | 99643142  | 99644079  | 9  |
| hsa-mir-770           | 100385433 | 100386041 | 100388480- 100388577 | 10 | + | chr14 | 100387824 | 100388808 | 9  |
| hsa-mir-629           | 68177210  | 68177410  |                      | 20 | - | chr15 | 68175183  | 68176381  | 10 |
| hsa-mir-140           | 68353649  | 68353849  |                      | 25 | + | chr16 | 68353308  | 68354641  | 16 |
| hsa-mir-140           |           |           | 68524485- 68524584   |    | + | chr16 | 68523996  | 68524960  | 10 |
| hsa-mir-193b          | 14303600  | 14303800  | 14305325-14305407    | 25 | + | chr16 | 14302511  | 14304605  | 14 |
| hsa-mir-365-1         | 14303600  | 14303800  |                      | 13 | + | chr16 | 14302511  | 14304605  | 14 |
| hsa-mir-10a           | 44014310  | 44014709  | 44012199- 44012308   | 15 | - | chr17 | 44008884  | 44011068  | 51 |
| hsa-mir-10a           | 44014310  | 44014709  | 44012199- 44012308   | 15 | - | chr17 | 44013523  | 44015182  | 9  |
| hsa-mir-132           | 1899412   | 1901670   | 1899952-1900052      | 10 | - | chr17 | 1899338   | 1901306   | 23 |
| (cluster-hsa-mir-132) |           |           |                      |    |   |       |           |           |    |
| has-mir-212           | 1899412   | 1901670   | 1900315-1900424      |    | - | chr17 | 1899338   | 1901306   | 23 |
| (cluster-hsa-mir-132) |           |           |                      |    |   |       |           |           |    |
| hsa-mir-132           | 1899412   | 1901670   | 1899952-1900052      | 10 | - | chr17 | 1903422   | 1904692   | 23 |
| (cluster-hsa-mir-132) |           |           |                      |    |   |       |           |           |    |
| has-mir-212           | 1899412   | 1901670   | 1900315-1900424      |    | - | chr17 | 1903422   | 1904692   | 23 |
| (cluster-hsa-mir-132) |           |           |                      |    |   |       |           |           |    |
| hsa-mir-634           | 61729287  | 61729487  |                      | 21 | + | chr17 | 61728232  | 61730014  | 19 |
| hsa-mir-152           | 43470051  | 43470251  | 43469526-43469612    | 35 | - | chr17 | 43469206  | 43470940  | 15 |
| hsa-mir-22            | 1566155   | 1566355   | 1563947-1564031      | 30 | - | chr17 | 1565778   | 1567025   | 15 |
| hsa-mir-142           | 53379405  | 53785839  |                      | 10 | - | chr17 | 53755132  | 53757845  | 14 |
| hsa-mir-142           | 53379405  | 53785839  |                      | 10 | - | chr17 | 53515159  | 53516879  | 14 |
| hsa-mir-142           | 53379405  | 53785839  | 53763592-53763678    | 10 | - | chr17 | 53763238  | 53766135  | 13 |
| hsa-mir-142           | 53379405  | 53785839  | 53763592-53763678    | 10 | - | chr17 | 53760183  | 53761181  | 11 |
| hsa-mir-142           | 53379405  | 53785839  |                      | 10 | - | chr17 | 53382858  | 53383856  | 11 |
| hsa-mir-142           | 53379405  | 53785839  |                      | 10 | - | chr17 | 53740252  | 53741278  | 10 |
| hsa-mir-142           | 53379405  | 53785839  |                      | 10 | - | chr17 | 53671286  | 53672139  | 10 |
| hsa-mir-142           | 53379405  | 53785839  |                      | 10 | - | chr17 | 53738154  | 53739803  | 9  |
| hsa-mir-142           | 53379405  | 53785839  |                      | 10 | - | chr17 | 53710616  | 53711911  | 9  |
| hsa-mir-142           | 53379405  | 53785839  |                      | 10 | - | chr17 | 53747423  | 53748589  | 9  |
| hsa-mir-632           | 27701164  | 27701364  | 27701241-27701334    | 30 | + | chr17 | 27700798  | 27702071  | 11 |
| hsa-mir-641           | 45482936  | 45483136  | 45480290-45480388    | 30 | - | chr19 | 45482340  | 45483703  | 31 |
| hsa-mir-639           | 14501281  | 14501481  | 14501355-14501452    | 30 | + | chr19 | 14500517  | 14501603  | 20 |
| hsa-mir-642           | 50863241  | 50863441  |                      | 20 | + | chr19 | 50862529  | 50864891  | 18 |
| hsa-mir-99b           | 56883717  | 56886813  | 56887677-56887746    | 10 | + | chr19 | 56884696  | 56887763  | 17 |
| hsa-mir-99b           | 56883717  | 56886813  | 56887677-56887746    | 10 | + | chr19 | 56883516  | 56884514  | 10 |
| hsa-let-7e            | 56883717  | 56886813  | 56887851-56887929    | 10 | + | chr19 | 56884696  | 56887763  | 17 |
| hsa-let-7e            | 56883717  | 56886813  | 56887851-56887929    | 10 | + | chr19 | 56883516  | 56884514  | 10 |
| hsa-mir-125a          | 56883717  | 56886813  |                      | 10 | + | chr19 | 56884696  | 56887763  | 17 |
| hsa-mir-125a          | 56883717  | 56886813  | 56888319-56888404    | 10 | + | chr19 | 56883516  | 56884514  | 10 |
| hsa-mir-640           | 19377543  | 19377743  |                      | 9  | + | chr19 | 19377591  | 19378708  | 16 |

|               |           |           |                      |    |   |       |           |           |    |
|---------------|-----------|-----------|----------------------|----|---|-------|-----------|-----------|----|
| hsa-mir-24-2  | 13807762  | 13808928  | 13808101-13808173    | 10 | - | chr19 | 13810990  | 13812054  | 13 |
| hsa-mir-24-2  | 13818427  | 13819944  |                      | 1  | - | chr19 | 13814056  | 13815402  | 10 |
| hsa-mir-27a   | 13807762  | 13808928  | 13808254-13808331    | 10 | - | chr19 | 13810990  | 13812054  | 13 |
| hsa-mir-27a   | 13818427  | 13819944  |                      | 1  | - | chr19 | 13814056  | 13815402  | 10 |
| hsa-mir-23a   | 13807762  | 13808928  | 13808401-13808473    | 10 | - | chr19 | 13810990  | 13812054  | 13 |
| hsa-mir-23a   | 13818427  | 13819944  |                      | 1  | - | chr19 | 13814056  | 13815402  | 10 |
| hsa-mir-7-3   | 4720051   | 4720251   | 4721682-4721791      | 32 | + | chr19 | 4721193   | 4722191   | 9  |
| hsa-mir-637   | 3921938   | 3922138   |                      | 20 | - | chr19 | 3917072   | 3918070   | 9  |
| hsa-mir-637   |           |           | 3912412- 3912510     |    | - | chr19 | 3914806   | 3916047   | 9  |
| hsa-mir-558   | 32435133  | 32435333  |                      | 20 | + | chr2  | 32435252  | 32437174  | 20 |
| hsa-mir-26b   | 218972621 | 218972821 |                      | 30 | + | chr2  | 218968493 | 218969942 | 19 |
| hsa-mir-149   | 241023687 | 241023887 |                      | 18 | + | chr2  | 241022192 | 241023934 | 12 |
| hsa-mir-149   | 241040800 | 241041000 | 241044091- 241044179 | 9  | + | chr2  | 241042067 | 241043195 | 10 |
| hsa-mir-149   | 241043770 | 241044582 | 241044091- 241044179 | 10 | + | chr2  | 241042067 | 241043195 | 10 |
| hsa-mir-124-3 | 61276703  | 61277978  | 61280297-61280383    | 9  | + | chr20 | 61278534  | 61282127  | 33 |
| hsa-mir-124-3 | 61278418  | 61280978  | 61280297-61280383    | 10 | + | chr20 | 61278534  | 61282127  | 33 |
| hsa-mir-124-3 | 61276703  | 61277978  |                      | 9  | + | chr20 | 61273473  | 61274471  | 10 |
| hsa-mir-124-3 | 61278418  | 61280978  |                      | 10 | + | chr20 | 61273473  | 61274471  | 10 |
| hsa-mir-103-2 | 3817385   | 3817585   |                      | 20 | + | chr20 | 3816986   | 3818449   | 25 |
| hsa-mir-647   | 62058112  | 62058312  |                      | 20 | - | chr20 | 62059359  | 62060407  | 13 |
| hsa-mir-647   |           |           | 62044428-62044523    |    | - | chr20 | 62040150  | 62041214  | 10 |
| hsa-mir-647   | 62058112  | 62058312  | 62044428-62044523    | 20 | - | chr20 | 62057132  | 62058582  | 9  |
| hsa-mir-649   |           |           | 19718465-19718561    |    |   | chr22 | 19709172  | 19717877  | 26 |
| hsa-mir-649   | 19727706  | 19727906  |                      | 10 | - | chr22 | 19731117  | 19733193  | 15 |
| hsa-mir-649   | 19727706  | 19727906  |                      | 10 | - | chr22 | 19725856  | 19730822  | 14 |
| hsa-mir-185   | 18384436  | 18384636  |                      | 9  | + | chr22 | 18386406  | 18391255  | 38 |
| hsa-mir-185   | 18388530  | 18388730  |                      | 20 | + | chr22 | 18386406  | 18391255  | 38 |
| hsa-mir-185   | 18384436  | 18384636  |                      | 9  | + | chr22 | 18381778  | 18386395  | 36 |
| hsa-mir-185   | 18388530  | 18388730  |                      | 20 | + | chr22 | 18381778  | 18386395  | 36 |
| hsa-mir-185   | 18353537  | 18353737  |                      | 8  | + | chr22 | 18351413  | 18357726  | 23 |
| hsa-mir-185   | 18353537  | 18353737  |                      | 8  | + | chr22 | 18357853  | 18359277  | 18 |
| hsa-mir-185   | 18384436  | 18384636  |                      | 9  | + | chr22 | 18379454  | 18381521  | 13 |
| hsa-mir-185   | 18388530  | 18388730  |                      | 20 | + | chr22 | 18391737  | 18393577  | 10 |
| hsa-mir-185   |           |           | 18400662- 18400743   |    | + | chr22 | 18403536  | 18406547  | 20 |
| hsa-mir-185   |           |           | 18400662- 18400743   |    | + | chr22 | 18398616  | 18403407  | 19 |
| hsa-mir-185   |           |           | 18400662- 18400743   |    | + | chr22 | 18396013  | 18397798  | 9  |
| hsa-mir-650   | 21491481  | 21491681  | 21495270- 21495365   | 10 | + | chr22 | 21481503  | 21493798  | 29 |
| hsa-mir-650   | 21491481  | 21491681  | 21495270- 21495365   | 10 | + | chr22 | 21494147  | 21496551  | 13 |
| hsa-mir-33a   | 40558951  | 40559151  |                      | 19 | + | chr22 | 40558199  | 40560138  | 21 |
| hsa-mir-301b  | 20335495  | 20337979  | 20337270-20337347    | 10 | + | chr22 | 20335155  | 20339104  | 20 |
| hsa-mir-130b  | 20335495  | 20337979  | 20337593-20337674    | 10 | + | chr22 | 20335155  | 20339104  | 20 |
| hsa-mir-301b  | 20335495  | 20337979  | 20337270-20337347    | 10 | + | chr22 | 20340131  | 20343284  | 19 |

|               |           |           |                      |    |   |       |           |           |    |
|---------------|-----------|-----------|----------------------|----|---|-------|-----------|-----------|----|
| hsa-mir-130b  | 20335495  | 20337979  | 20337593-20337674    | 10 | + | chr22 | 20340131  | 20343284  | 19 |
| hsa-mir-301b  | 20335495  | 20337979  | 20337270-20337347    | 10 | + | chr22 | 20332257  | 20333984  | 9  |
| hsa-mir-130b  | 20335495  | 20337979  | 20337593-20337674    | 10 | + | chr22 | 20332257  | 20333984  | 9  |
| hsa-mir-301b  | 20335495  | 20337979  |                      | 10 | + | chr22 | 20330285  | 20331488  | 9  |
| hsa-mir-130b  | 20335495  | 20337979  |                      | 10 | + | chr22 | 20330285  | 20331488  | 9  |
| hsa-mir-26a-1 | 37878072  | 37878272  |                      | 24 | + | chr3  | 37878214  | 37879646  | 57 |
| hsa-mir-563   | 15876545  | 15876745  |                      | 10 | + | chr3  | 15875648  | 15877419  | 26 |
| hsa-mir-569   | 172660712 | 172660912 |                      | 18 | - | chr3  | 172660321 | 172661437 | 24 |
| hsa-mir-566   | 50167751  | 50167951  |                      | 19 | + | chr3  | 50166416  | 50167713  | 16 |
| hsa-mir-26a-1 | 37878072  | 37878272  |                      | 24 | + | chr3  | 37876068  | 37877886  | 11 |
| hsa-mir-425   | 49029742  | 49035883  | 49032585-49032671    | 10 | - | chr3  | 49033085  | 49034121  | 11 |
| hsa-mir-191   | 49029742  | 49035883  | 49033055-49033146    | 10 | - | chr3  | 49033085  | 49034121  | 11 |
| hsa-let-7g    | 52287341  | 52287541  |                      | 23 | - | chr3  | 52287474  | 52288472  | 10 |
| hsa-mir-198   | 121652433 | 121652633 |                      | 19 | - | chr3  | 121652675 | 121653655 | 9  |
| hsa-mir-574   | 38545731  | 38545931  | 38546048-38546143    | 30 | + | chr4  | 38545109  | 38546745  | 26 |
| hsa-mir-575   | 83938849  | 83939049  |                      | 20 | - | chr4  | 83937347  | 83938582  | 10 |
| hsa-mir-576   | 110574219 | 110574419 |                      | 20 | + | chr4  | 110573931 | 110575286 | 13 |
| hsa-mir-95    | 8211359   | 8211559   |                      | 18 | - | chr4  | 8210996   | 8212044   | 12 |
| hsa-mir-95    |           |           | 8057928- 8058008     |    |   | chr4  | 8052475   | 8053464   | 9  |
| hsa-mir-218-1 | 19863881  | 19864081  |                      | 21 | + | chr4  | 19864904  | 19865902  | 9  |
| hsa-mir-887   | 15553204  | 15553404  |                      | 21 | + | chr5  | 15553440  | 15554817  | 16 |
| hsa-mir-581   | 53642060  | 53642260  |                      | 20 | - | chr5  | 53641824  | 53642947  | 15 |
| hsa-mir-103-1 | 167939066 | 167939266 |                      | 20 | - | chr5  | 167938292 | 167939686 | 14 |
| hsa-mir-579   | 32480501  | 32480701  |                      | 20 | - | chr5  | 32479115  | 32481331  | 13 |
| hsa-mir-583   | 95323360  | 95323560  |                      | 9  | + | chr5  | 95323035  | 95324103  | 12 |
| hsa-mir-219-1 | 33283025  | 33285248  | 33283590- 33283699   | 10 | + | chr6  | 33283400  | 33286057  | 60 |
| hsa-mir-586   | 45453548  | 45453748  |                      | 18 | - | chr6  | 45452670  | 45454160  | 23 |
| hsa-mir-877   | 30631312  | 30631512  |                      | 19 | + | chr6  | 30630942  | 30632795  | 17 |
| hsa-mir-877   |           |           | 30660088- 30660173   |    | + | chr6  | 30659500  | 30660540  | 11 |
| hsa-mir-25    | 99537263  | 99537463  |                      | 20 | - | chr7  | 99535358  | 99536719  | 51 |
| hsa-mir-93    | 99537263  | 99537463  |                      | 20 | - | chr7  | 99535358  | 99536719  | 51 |
| hsa-mir-106b  | 99537263  | 99537463  |                      | 20 | - | chr7  | 99535358  | 99536719  | 51 |
| hsa-mir-96    | 129204548 | 129210298 |                      | 10 | - | chr7  | 129205887 | 129208547 | 23 |
| hsa-mir-96    |           |           | 129201768- 129201845 |    | - | chr7  | 129197933 | 129198987 | 12 |
| hsa-mir-96    | 129204548 | 129210298 | 129201768- 129201845 | 10 | - | chr7  | 129199595 | 129201130 | 9  |
| hsa-mir-183   | 129204548 | 129210298 |                      | 10 | - | chr7  | 129205887 | 129208547 | 23 |
| hsa-mir-183   |           |           | 129201981- 129202090 |    | - | chr7  | 129197933 | 129198987 | 12 |
| hsa-mir-183   | 129204548 | 129210298 | 129201981- 129202090 | 10 | - | chr7  | 129199595 | 129201130 | 9  |
| hsa-mir-671   | 150560417 | 150560617 |                      | 20 | + | chr7  | 150559882 | 150560988 | 18 |
| hsa-mir-339   | 1034424   | 1034624   |                      | 9  | - | chr7  | 1034133   | 1035532   | 15 |
| hsa-mir-339   | 1030750   | 1031846   |                      | 10 | - | chr7  | 1034133   | 1035532   | 15 |
| hsa-mir-335   | 129919123 | 129919323 |                      | 10 | + | chr7  | 129918341 | 129919952 | 13 |

|                |           |           |                      |    |   |      |           |           |    |
|----------------|-----------|-----------|----------------------|----|---|------|-----------|-----------|----|
| hsa-mir-148a   | 25955148  | 25959801  | 25956064-25956131    | 10 | - | chr7 | 25956856  | 25958113  | 12 |
| hsa-mir-153-2  | 158073079 | 158073279 |                      | 13 | - | chr7 | 158070702 | 158071700 | 11 |
| hsa-mir-153-2  | 157062118 | 157062318 |                      | 20 | - | chr7 | 157065835 | 157067825 | 10 |
| hsa-mir-153-2  | 158073079 | 158073279 |                      | 13 | - | chr7 | 158075026 | 158076024 | 11 |
| hsa-mir-595    | 158073079 | 158073279 |                      | 18 | - | chr7 | 158070702 | 158071700 | 11 |
| hsa-mir-595    | 158073079 | 158073279 |                      | 18 | - | chr7 | 158075026 | 158076024 | 11 |
| hsa-mir-550-2  | 32501558  | 32501758  |                      | 19 | + | chr7 | 32501292  | 32502345  | 10 |
| hsa-mir-591    | 95789241  | 95789441  |                      | 20 | - | chr7 | 95789083  | 95790081  | 9  |
| hsa-mir-661    |           |           | 145091347- 145091435 |    | - | chr8 | 145087661 | 145090032 | 52 |
| hsa-mir-661    | 145099890 | 145100090 |                      | 10 | - | chr8 | 145095367 | 145098626 | 24 |
| hsa-mir-661    | 145121431 | 145121631 |                      | 17 | - | chr8 | 145118427 | 145120534 | 23 |
| hsa-mir-661    | 145121431 | 145121631 |                      | 17 | - | chr8 | 145121113 | 145123364 | 21 |
| hsa-mir-548d-1 | 124497671 | 124497871 |                      | 18 | - | chr8 | 124497370 | 124498988 | 13 |
| hsa-mir-596    | 1752393   | 1753192   | 1752804-1752880      | 10 | + | chr8 | 1752011   | 1753037   | 13 |
| hsa-mir-598    | 11096185  | 11096385  |                      | 19 | - | chr8 | 11094552  | 11096313  | 9  |
| hsa-mir-151    | 142080414 | 142080614 |                      | 19 | - | chr8 | 142079967 | 142080962 | 9  |
| hsa-mir-602    | 139633164 | 139633364 |                      | 17 | + | chr9 | 139632535 | 139634159 | 28 |
| hsa-mir-601    | 125732138 | 125732338 |                      | 19 | - | chr9 | 125731230 | 125733010 | 27 |
| hsa-mir-23b    | 96806816  | 96807016  |                      | 6  | + | chr9 | 96806161  | 96807548  | 26 |
| hsa-mir-23b    |           |           | 96887311- 96887407   |    |   |      | 96885082  | 96886165  | 12 |
| hsa-mir-27b    | 96806816  | 96807016  |                      | 6  | + | chr9 | 96806161  | 96807548  | 26 |
| hsa-mir-27b    |           |           | 96887548-96887644    |    |   |      | 96885082  | 96886165  | 12 |
| hsa-mir-24-1   | 96806816  | 96807016  |                      | 6  | + | chr9 | 96806161  | 96807548  | 26 |
| hsa-mir-24-1   |           |           | 96888124-96888191    |    |   |      | 96885082  | 96886165  | 12 |
| hsa-mir-455    | 115957951 | 115958151 |                      | 20 | + | chr9 | 115954575 | 115957533 | 14 |
| hsa-mir-199b   | 130046615 | 130047143 |                      | 10 | - | chr9 | 130041503 | 130043718 | 12 |
| hsa-mir-199b   | 130046615 | 130047143 | 130046821-130046930  | 10 | - | chr9 | 130046525 | 130048798 | 10 |
| hsa-let-7a-1   | 95968291  | 95968491  |                      | 10 | + | chr9 | 95967612  | 95969482  | 10 |
| hsa-let-7f-1   | 95968291  | 95968491  |                      | 10 | + | chr9 | 95967612  | 95969482  | 10 |
| hsa-let-7d     | 95968291  | 95968491  |                      | 10 | + | chr9 | 95967612  | 95969482  | 10 |
| hsa-mir-126    | 138679952 | 138680152 | 138684875-138684959  | 10 | + | chr9 | 138680045 | 138681200 | 10 |
| hsa-mir-126    | 138679952 | 138680152 | 138684875-138684959  | 10 | + | chr9 | 138682056 | 138683672 | 9  |
| hsa-mir-32     | 110921946 | 110922146 |                      | 19 | - | chr9 | 110920926 | 110922542 | 9  |
| hsa-mir-219-2  | 130194040 | 130195803 | 130194718-130194814  | 10 | - | chr9 | 130195196 | 130196699 | 9  |
| hsa-mir-181a-2 | 126460466 | 126460666 |                      | 10 | + | chr9 | 126460891 | 126461888 | 9  |
| hsa-mir-181b-2 | 126460466 | 126460666 |                      | 10 | + | chr9 | 126460891 | 126461888 | 9  |
| hsa-mir-652    | 109132898 | 109133098 |                      | 20 | + | chrX | 109131651 | 109133456 | 16 |
