# Supplementary figures and images for: Global Egr1-miRNAs Binding Analysis in PMA-Induced K562 Cells Using ChIP-Seq
Source: Hindawi journal article supplement (doi:10.1155/2010/867517), 2010-01-01

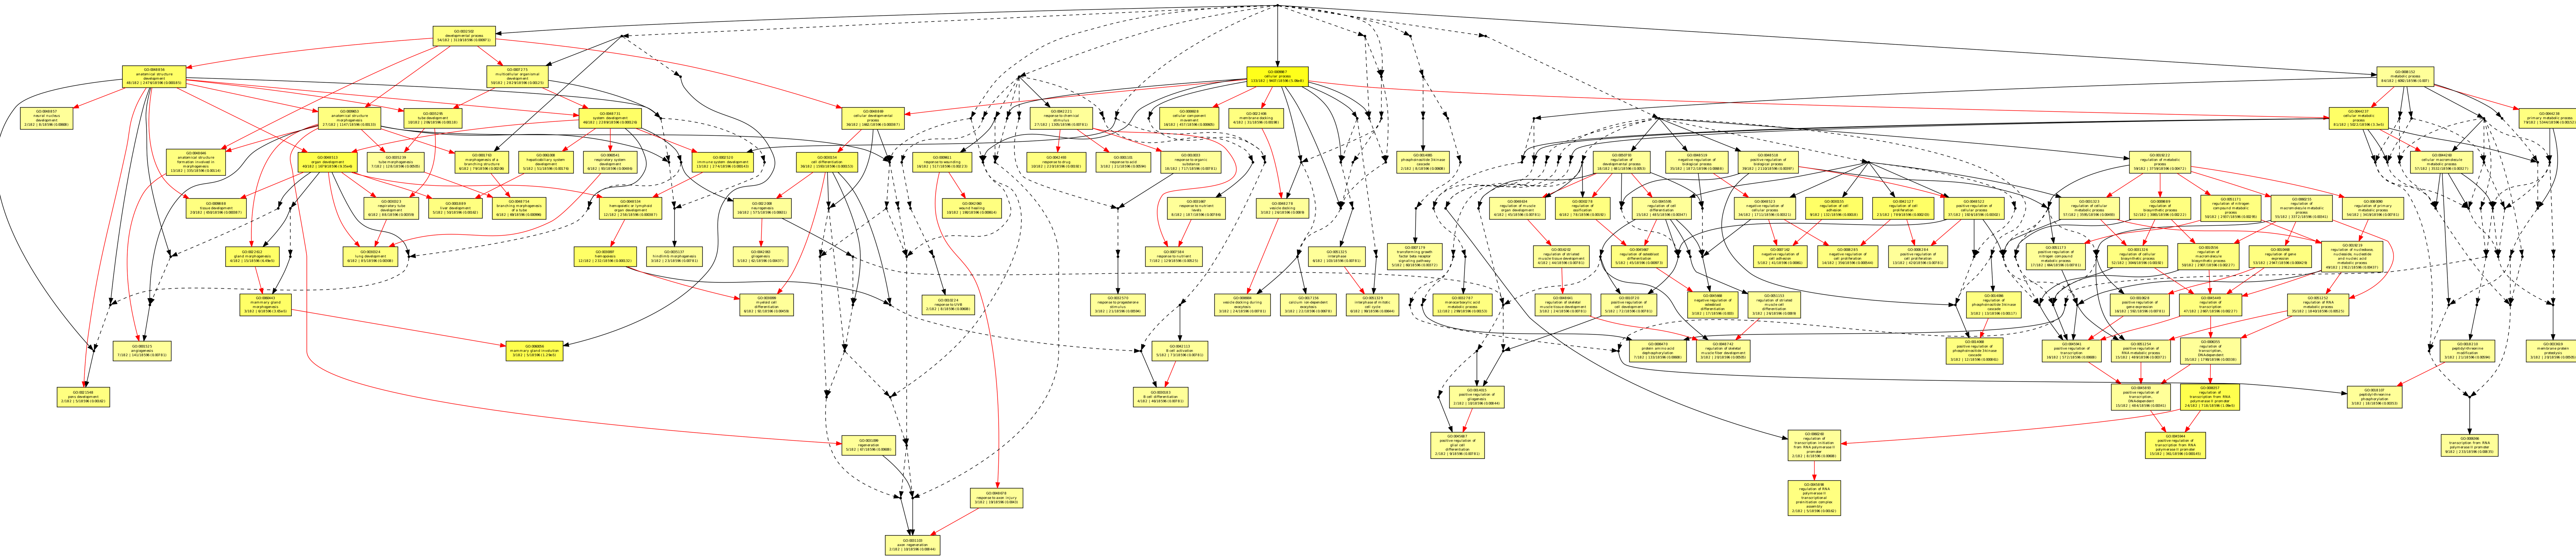

Supplement: f1 [file 867517.f1.pdf]

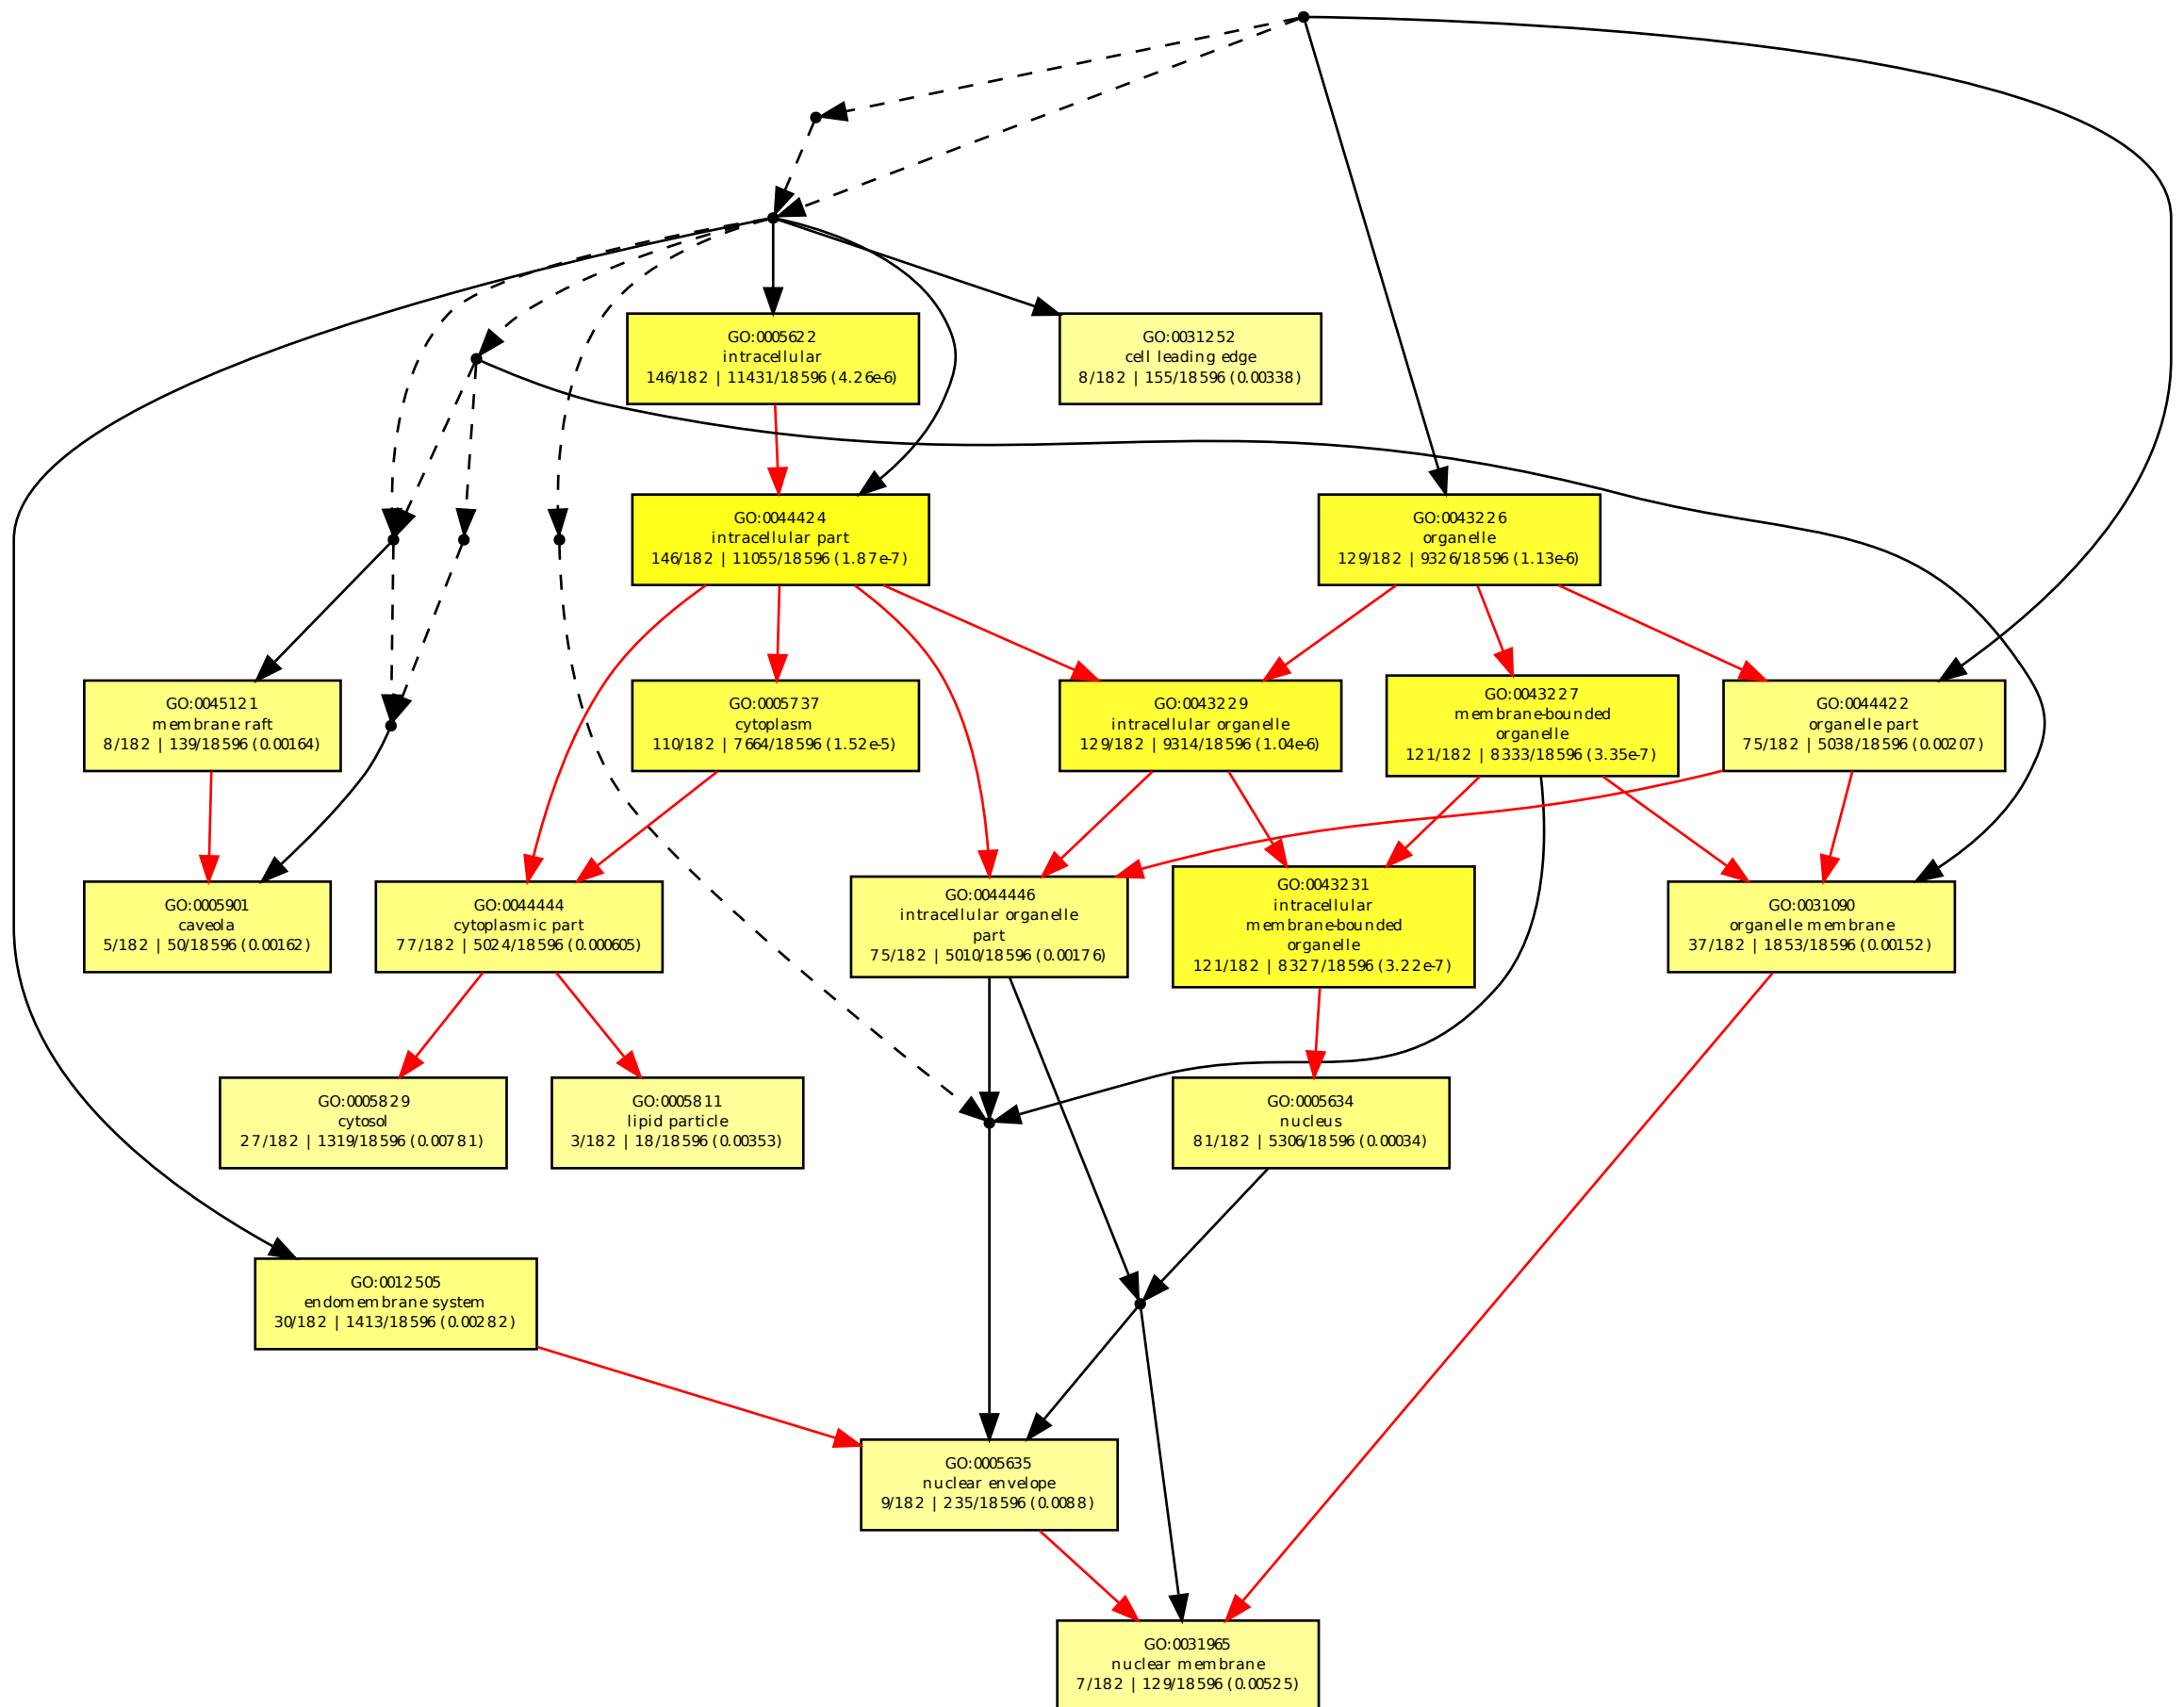

Supplement: f2 [file 867517.f2.pdf]

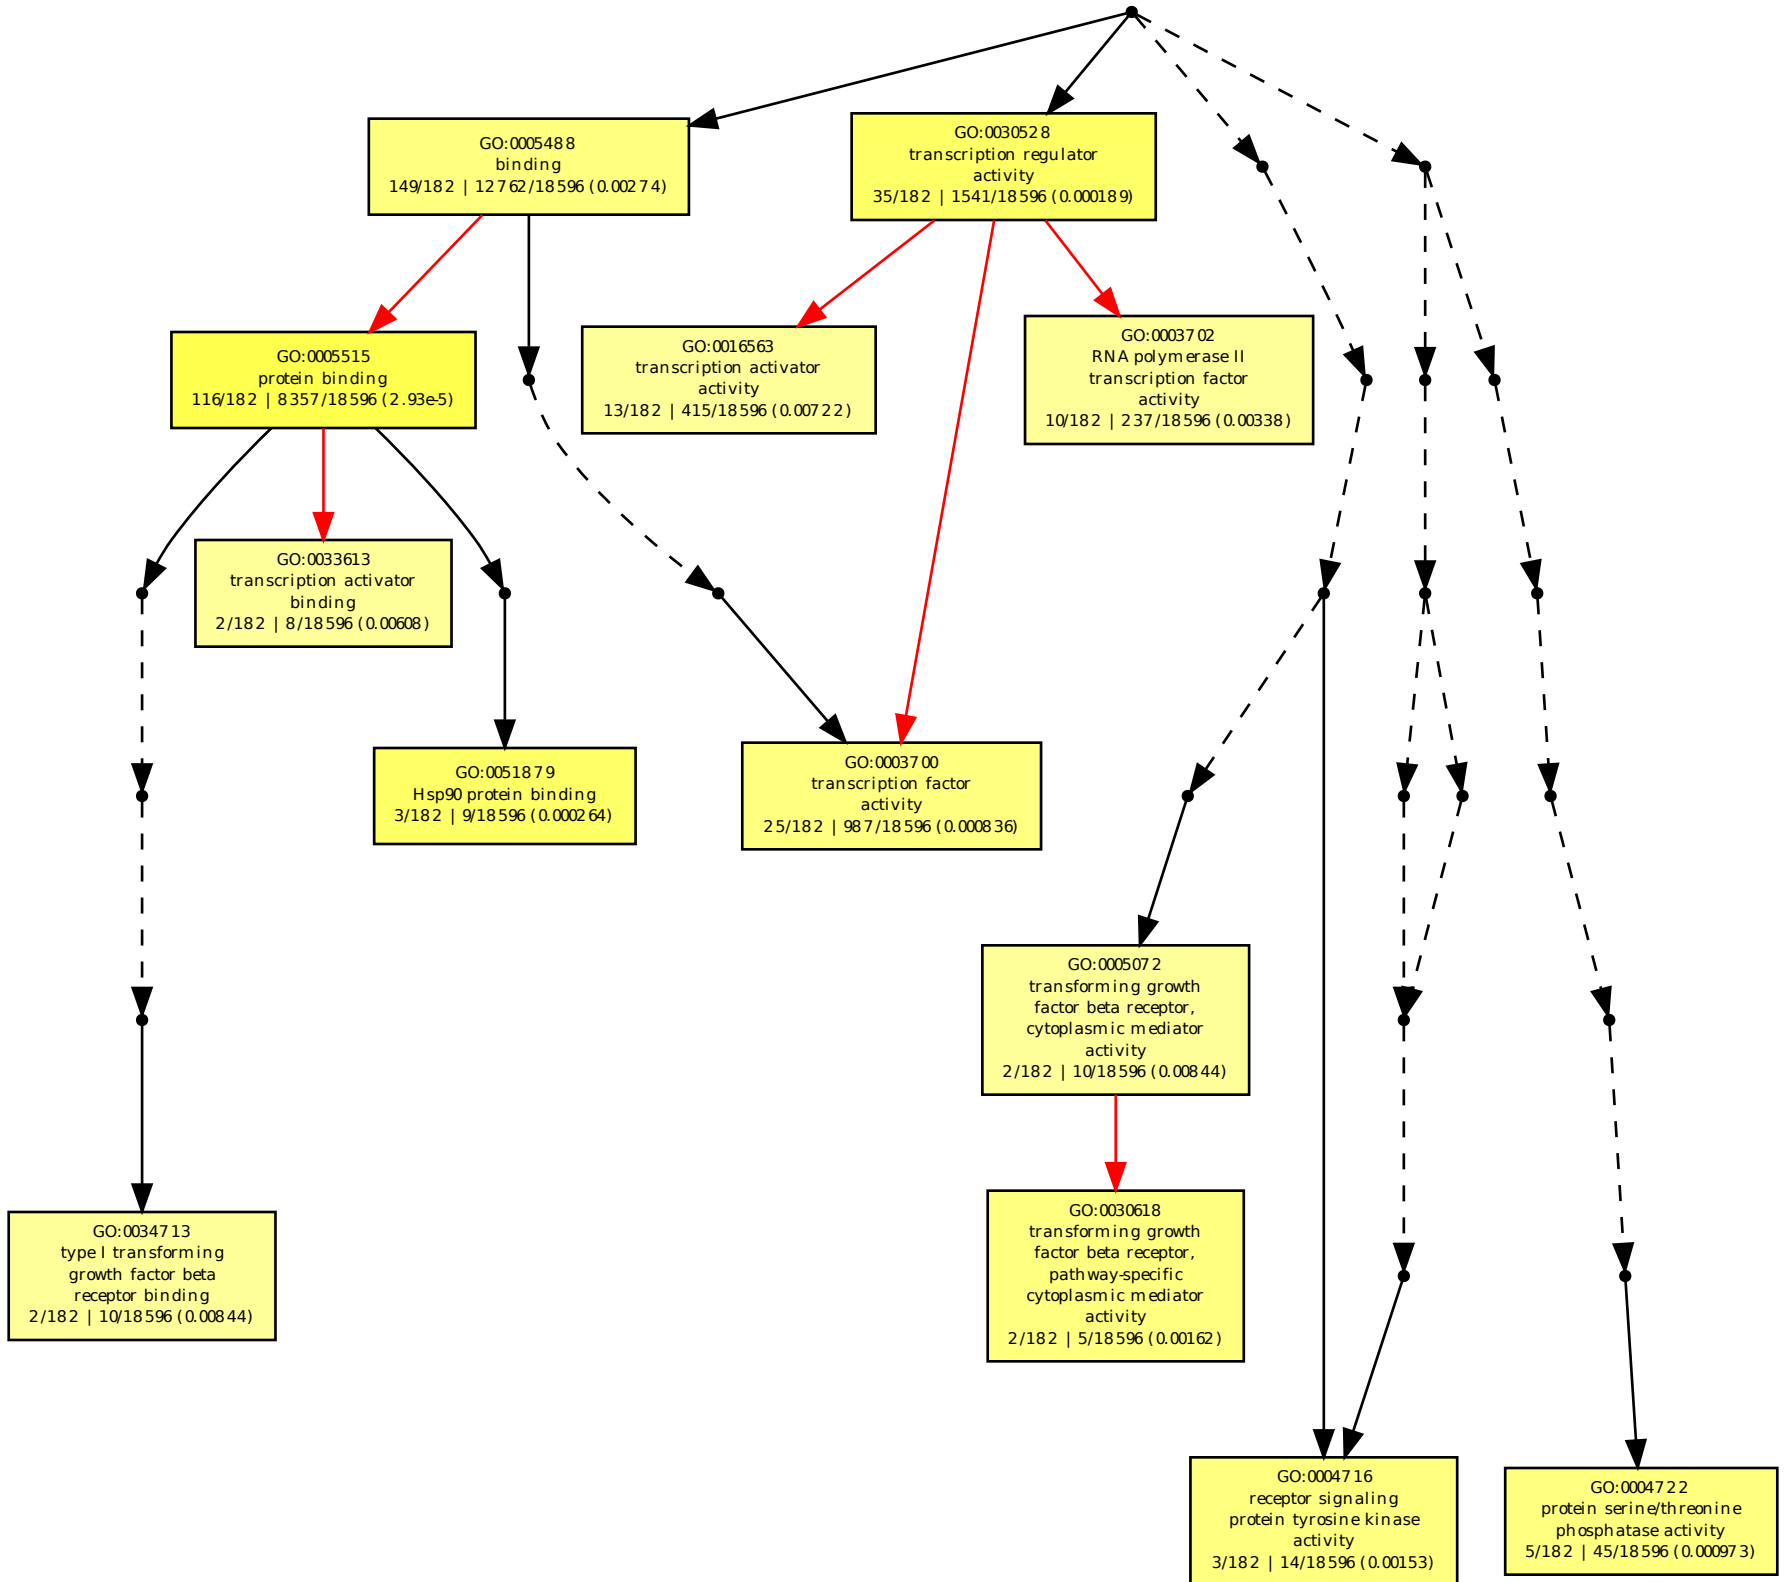

Supplement: f3 [file 867517.f3.pdf]
